# Supplementary material for: Predictors of a placebo response in patients with hand osteoarthritis: post-hoc analysis of two randomized controlled trials
Source: Springer Nature journal article supplement (doi:10.1186/s12891-021-04089-9), 2021-03-04
Supplement: MOESM1 [file 18929326]

## SUPPLEMENTARY MATERIAL

**Supplementary table S1. Correlation between AUSCAN pain with baseline characteristics.**

| AUSCAN-pain  |          | Age    | OA duration | BMI   | Weight | Height | CRP    | ESR    | TJC          | SJC    | EJC    | DJC    | AUSCAN-Stiff     | AUSCAN-Fct       |
|--------------|----------|--------|-------------|-------|--------|--------|--------|--------|--------------|--------|--------|--------|------------------|------------------|
| <b>RCT 1</b> | <b>r</b> | -0.023 | -0.107      | 0.071 | 0.069  | -0.010 | -0.139 | -0.022 | 0.057        | 0.032  | -0.044 | -0.065 | 0.312            | 0.743            |
|              | <b>p</b> | 0.815  | 0.284       | 0.477 | 0.489  | 0.918  | 0.165  | 0.822  | 0.567        | 0.749  | 0.659  | 0.515  | <b>0.001</b>     | <b>&lt;0.001</b> |
| <b>RCT 2</b> | <b>r</b> | 0.192  | 0.197       | 0.074 | -0.007 | -0.114 | 0.184  | -0.143 | 0.506        | -0.129 | N/A    | N/A    | 0.658            | 0.835            |
|              | <b>p</b> | 0.229  | 0.217       | 0.644 | 0.963  | 0.478  | 0.339  | 0.377  | <b>0.001</b> | 0.421  | N/A    | N/A    | <b>&lt;0.001</b> | <b>&lt;0.001</b> |

Correlation between pain and other characteristics was calculated using Pearson's correlation.

AUSCAN, Australian/Canadian Osteoarthritis Hand Index; CRP, C-reactive protein; DJC, deformed joint count; Fct, function; EJC, enlarged joint count; ESR, erythrocyte sedimentation rate; NSAID, non-steroidal anti-inflammatory drug; OA, osteoarthritis. SJC, swollen joint count; TJC, tender joint count; Stiff, stiffness. N/A, not available.

**Supplementary table S2. Placebo response (change from baseline) at 4 weeks in RCT 1 and RCT 2.**

|                             | RCT 1       |             |              | RCT 2       |             |              | P-value*         |
|-----------------------------|-------------|-------------|--------------|-------------|-------------|--------------|------------------|
|                             | Baseline    | Week 4      | Difference   | Baseline    | Week 4      | Difference   |                  |
| AUSCAN pain                 | 47.8 ± 19.8 | 41.8 ± 21.8 | -6.0 ± 19.7  | 48.9 ± 25.9 | 42.8 ± 24.5 | -6.1 ± 22.1  | 0.788            |
| AUSCAN stiffness            | 60.6 ± 21.7 | 51 ± 24.5   | -9.6 ± 23.9  | 63.9 ± 27.6 | 53.8 ± 25.2 | -10.0 ± 23.2 | 0.504            |
| AUSCAN function             | 45.7 ± 23.7 | 41.1 ± 21.9 | -4.5 ± 18.4  | 41.7 ± 27.1 | 39.8 ± 25.1 | -1.8 ± 18.8  | 0.382            |
| Patient global assessment   | 49.6 ± 15.9 | 44.6 ± 21.6 | -5.0 ± 19.6  | 60.8 ± 19.4 | 51 ± 26.4   | -9.7 ± 20.7  | <b>0.002</b>     |
| Physician global assessment | 41.0 ± 13.0 | 30.9 ± 14.1 | -10.1 ± 15.6 | 42.6 ± 10.5 | 33.6 ± 15   | -8.8 ± 11.9  | 0.471            |
| Tender joint count          | 6.3 ± 5.1   | 5.3 ± 5.4   | -1.0 ± 4.4   | 5.5 ± 5     | 5.3 ± 5.6   | -0.3 ± 4.5   | 0.400            |
| Swollen joint count         | 0.9 ± 2.4   | 0.5 ± 1.8   | -0.4 ± 2.2   | 0.0 ± 0.3   | 0.1 ± 0.5   | 0.0 ± 0.6    | <b>&lt;0.001</b> |

AUSCAN, Australian/Canadian Osteoarthritis Hand Index; RCT, randomized controlled trial.

**\*Comparison of difference (change from baseline) between RCT 1 and RCT 2.**
